# Supplementary material for: Targeted delivery of CRISPR interference system against Fabp4 to white adipocytes ameliorates obesity, inflammation, hepatic steatosis, and insulin resistance
Source: HighWire-hosted journal article supplement (doi:10.1101/gr.246900.118), 2019-08-29
Supplement: Supplemental_Table_S1.docx [file Supplemental_Table_S1.docx]

|  |  |  | Mismatches | | | |
| --- | --- | --- | --- | --- | --- | --- |
|  | **RGEN Target** | **Direction** | **0 bp** | **1 bp** | **2 bp** | **3 bp** |
| sgRNA#1 | CATCAGCGTAAATGGGGATTTGG | + | 1 | 0 | 0 | 19 |
| sgRNA#2 | CACCGAGATTTCCTTCAAACTGG | + | 1 | 0 | 0 | 18 |
| sgRNA#3 | GAATTCCACGCCCAGTTTGAAGG | - | 1 | 0 | 0 | 5 |
| sgRNA#4 | ATGAAATCACCGCAGACGACAGG | + | 1 | 0 | 0 | 4 |

**Supplemental Table S1.** Fabp4 sgRNAsequences andoff-targeting results of exon candidates.
